# Supplementary material for: A Nationwide Survey of Animal Science Students’ Perceptions of Animal Welfare across Different Animal Categories at Institutions in the United States
Source: MDPI journal article supplement (doi:10.3390/ani12172294), 2022-09-05
Supplement: s1 [file s1]

**The consent form is not included in this document.**

## Questions

What does animal welfare mean to you?

In your opinion, what does an agricultural animal (cattle, sheep, goat, pig, or poultry intended for food and fiber use) need in order to have a good life?

In your opinion, what does a dog or cat need in order to have a good life?

In your opinion, what does a horse or other equid need in order to have a good life?

What are the top 3 animal welfare challenges that you think are relevant to agricultural animal production?

Challenge #1

Challenge #2

Challenge #3

What are the top 3 animal welfare challenges that you think are relevant to companion animals (cats, dogs, hamsters, etc)?

Challenge #1

Challenge #2

Challenge #3

I feel confident I know how to research and discuss an animal welfare topic, even one that I know very little about, in order to form an educated opinion that I can communicate to others.

- ☐ Strongly agree
- ☐ Somewhat agree
- ☐ Neither agree nor disagree
- ☐ Somewhat disagree
- ☐ Strongly disagree

If you had a question about animal welfare, which of the following resources would you use? Select all that apply.

- ☐ Peer-reviewed publications
- ☐ Extension website
- ☐ Livestock/veterinary associations
- ☐ Humane Society of the United States
- ☐ General web search
- ☐ Social media
- ☐ Peers or relatives
- ☐ Other, please specify

At your university, which of the following types of education or opportunities are offered for animal welfare? Choose all that apply.

|                             | Within your Animal<br>Science Department | Outside your Animal<br>Science Department | I don't know          |
|-----------------------------|------------------------------------------|-------------------------------------------|-----------------------|
| Animal welfare judging team | <input type="radio"/>                    | <input type="radio"/>                     | <input type="radio"/> |
| Animal welfare club         | <input type="radio"/>                    | <input type="radio"/>                     | <input type="radio"/> |
| Animal welfare course       | <input type="radio"/>                    | <input type="radio"/>                     | <input type="radio"/> |
| Animal behavior course      | <input type="radio"/>                    | <input type="radio"/>                     | <input type="radio"/> |
| Combination animal          | <input type="radio"/>                    | <input type="radio"/>                     | <input type="radio"/> |

welfare/animal      behavior course

Graduate degree  
program in Animal  
Welfare

☐☐☐

Have you taken an animal welfare course?

☐ Yes

☐ No

Was it at your current university?

☐ Yes

☐ No

It is important to have an animal welfare course as part of the animal science curriculum.

☐ Strongly agree

☐ Somewhat agree

☐ Neither agree nor disagree

☐ Somewhat disagree

☐ Strongly disagree

Animal welfare is an important component of my education.

☐ Strongly agree

☐ Somewhat agree

☐ Neither agree nor disagree

☐ Somewhat disagree

☐ Strongly disagree

Animal welfare courses would be helpful for my future career.

- ☐ Strongly agree
- ☐ Somewhat agree
- ☐ Neither agree nor disagree
- ☐ Somewhat disagree
- ☐ Strongly disagree

Concepts related to animal welfare are integrated in other courses in my degree.

- ☐ Strongly agree
- ☐ Somewhat agree
- ☐ Neither agree nor disagree
- ☐ Somewhat disagree
- ☐ Strongly disagree

Rate your confidence level in discussing the following components of animal welfare.

|                          | Very<br>confident     | Fairly<br>confident   | Somewhat<br>confident | Slightly<br>confident | Not at all<br>confident |
|--------------------------|-----------------------|-----------------------|-----------------------|-----------------------|-------------------------|
| Health                   | <input type="radio"/>   |
| Productivity             | <input type="radio"/>   |
| Behavior                 | <input type="radio"/>   |
| Pain                     | <input type="radio"/>   |
|                          | Very<br>confident     | Fairly<br>confident   | Somewhat<br>confident | Slightly<br>confident | Not at all<br>confident |
| Emotional states         | <input type="radio"/>   |
| Ethics/societal concerns | <input type="radio"/>   |

If I was faced with an animal welfare dilemma, I would feel confident addressing the issues.

- ☐ Strongly agree
- ☐ Somewhat agree
- ☐ Neither agree nor disagree
- ☐ Somewhat disagree
- ☐ Strongly disagree

Animal welfare is an important consideration in agricultural animal production.

- ☐ Strongly agree
- ☐ Somewhat agree
- ☐ Neither agree nor disagree
- ☐ Somewhat disagree
- ☐ Strongly disagree

Animal welfare is an important consideration for owning a cat or dog.

- ☐ Strongly agree
- ☐ Somewhat agree
- ☐ Neither agree nor disagree
- ☐ Somewhat disagree
- ☐ Strongly disagree

Animal welfare is an important consideration for owning a horse or other equid.

- ☐ Strongly agree
- ☐ Somewhat agree
- ☐ Neither agree nor disagree
- ☐ Somewhat disagree
- ☐ Strongly disagree

Animal welfare is an important consideration when conducting research with animals.

- ☐ Strongly agree
- ☐ Somewhat agree
- ☐ Neither agree nor disagree
- ☐ Somewhat disagree
- ☐ Strongly disagree

Animal welfare is an important consideration for wildlife.

- ☐ Strongly agree
- ☐ Somewhat agree
- ☐ Neither agree nor disagree
- ☐ Somewhat disagree
- ☐ Strongly disagree

If you were to take an animal welfare course, which of the following attributes would be most important? Select all that apply.

- ☐ Ethical discussions
- ☐ Hands-on application
- ☐ Practical, applied questions
- ☐ Understanding species differences
- ☐ Discussing current hot topics in animal welfare
- ☐ Other, please specify

What is your assessment of the importance of each of these parameters for animals raised for food and fiber?

|                        |                   |                         |                       |                         |                 |
|------------------------|-------------------|-------------------------|-----------------------|-------------------------|-----------------|
| Extremely<br>important | Very<br>important | Moderately<br>important | Slightly<br>important | Not at all<br>important | I don't<br>know |
|------------------------|-------------------|-------------------------|-----------------------|-------------------------|-----------------|

|                                          |                  |                       |                       |                       |                       |                       |                       |
|------------------------------------------|------------------|-----------------------|-----------------------|-----------------------|-----------------------|-----------------------|-----------------------|
| Room to move around                      | freely           | <input type="radio"/> |
|                                          |                  | <input type="radio"/> |
| Freedom to express                       | normal behaviors | <input type="radio"/> |
| Having a sufficient and comfortable area | to lie down      | <input type="radio"/> |
|                                          |                  | <input type="radio"/> |
| Freedom from fear                        | and distress     | <input type="radio"/> |
| Having positive interactions with humans |                  | <input type="radio"/> |
|                                          |                  | <input type="radio"/> |
|                                          |                  | <input type="radio"/> |
| Freedom from injury                      | and disease      | <input type="radio"/> |
|                                          |                  | <input type="radio"/> |
| Freedom from hunger                      |                  | <input type="radio"/> |
| Freedom from thirst                      |                  | <input type="radio"/> |
| Freedom from pain                        | and discomfort   |                       |                       |                       |                       |                       |                       |
| A painless death                         |                  |                       |                       |                       |                       |                       |                       |
| Having a life worth living               |                  |                       |                       |                       |                       |                       |                       |
| Ability for choice and control in their  | environment      |                       |                       |                       |                       |                       |                       |

What is your assessment of the importance of each of these parameters for a dog or cat?

|                     |                |                      |                    |                      |              |
|---------------------|----------------|----------------------|--------------------|----------------------|--------------|
| Extremely important | Very important | Moderately important | Slightly important | Not at all important | I don't know |
|---------------------|----------------|----------------------|--------------------|----------------------|--------------|

|                                                      |                       |                       |                       |                       |                       |                       |
|------------------------------------------------------|-----------------------|-----------------------|-----------------------|-----------------------|-----------------------|-----------------------|
| Room to move aroundfreely                            | <input type="radio"/> |
|                                                      | <input type="radio"/> |
| Freedom to expressnormal behaviors                   | <input type="radio"/> |
| Having a sufficient and comfortable area to lie down | <input type="radio"/> |

Freedom from fearand distress

|                                          |                       |                       |                       |                       |                       |                       |
|------------------------------------------|-----------------------|-----------------------|-----------------------|-----------------------|-----------------------|-----------------------|
|                                          | Extremely important   | Very important        | Moderately important  | Slightly important    | Not at all important  | I don't know          |
| Having positive interactions with humans | <input type="radio"/> |
| Freedom from injuryand disease           | <input type="radio"/> |
|                                          | <input type="radio"/> |
| Freedom from hunger                      | <input type="radio"/> |
| Freedom from thirst                      | <input type="radio"/> |
|                                          | <input type="radio"/> |
| Freedom from painand discomfort          | <input type="radio"/> |
|                                          | <input type="radio"/> |
| A painless death                         | <input type="radio"/> |

Having a life worthlibing

Ability for choice and control in their environment

What is your assessment of the importance of each of these parameters for horses or other equids?

|                     |                |                      |                    |                      |              |
|---------------------|----------------|----------------------|--------------------|----------------------|--------------|
| Extremely important | Very important | Moderately important | Slightly important | Not at all important | I don't know |
|---------------------|----------------|----------------------|--------------------|----------------------|--------------|

|                                                      |                       |                       |                       |                       |                       |                       |
|------------------------------------------------------|-----------------------|-----------------------|-----------------------|-----------------------|-----------------------|-----------------------|
| Room to move aroundfreely                            | <input type="radio"/> |
|                                                      | <input type="radio"/> |
| Freedom to expressnormal behaviors                   | <input type="radio"/> |
| Having a sufficient and comfortable area to lie down | <input type="radio"/> |
|                                                      | <input type="radio"/> |
| Freedom from fearand distress                        | <input type="radio"/> |
| Having positive interactions with humans             | <input type="radio"/> |
|                                                      | <input type="radio"/> |
| Freedom from injuryand disease                       | <input type="radio"/> |

Freedom from hunger

Freedom from thirst

Freedom from painand discomfort

A painless death

|                                                     |                       |                       |                       |                       |                       |                       |
|-----------------------------------------------------|-----------------------|-----------------------|-----------------------|-----------------------|-----------------------|-----------------------|
|                                                     | Extremely important   | Very important        | Moderately important  | Slightly important    | Not at all important  | I don't know          |
| Having a life worthliving                           | <input type="radio"/> |
| Ability for choice and control in their environment | <input type="radio"/> |

Select your level of agreement with this statement. Predominant methods presently used to raise each animal type below for food and/or fiber provide an appropriate level of animal welfare.

|  |          |          |                   |          |          |                                 |
|--|----------|----------|-------------------|----------|----------|---------------------------------|
|  | Strongly | Somewhat | Neither agree nor | Somewhat | Strongly | I don't have enough information |
|--|----------|----------|-------------------|----------|----------|---------------------------------|

|                 | agree                 | agree                 | disagree              | disagree              | disagree              | to decide             |
|-----------------|-----------------------|-----------------------|-----------------------|-----------------------|-----------------------|-----------------------|
| Dairy cattle    | <input type="radio"/> |
| Beef cattle     | <input type="radio"/> |
| Poultry         | <input type="radio"/> |
| Swine           | <input type="radio"/> |
| Sheep and goats | <input type="radio"/> |

Is there anything else about your perspectives on animal welfare that you would like to share?

## Demographics

How old are you?

- ☐ 18-24
- ☐ 25-34
- ☐ 35-44
- ☐ 45-54
- ☐ 55-64
- ☐ 65 and older
- ☐ Decline to answer

What gender do you identify with?

- ☐ Man
- ☐ Woman
- ☐ Non-binary
- ☐ Other
- ☐ Decline to answer

How would you best describe yourself?

American Indian or Alaska Native

- ☐
- ☐ Asian
- ☐ Black or African American
- ☐ Native Hawaiian or Other Pacific Islander
- ☐ White
- ☐  Other, please specify:
- ☐ Decline to answer

Do you identify as Hispanic, Latino/a or Spanish?

- ☐ Yes
- ☐ No
- ☐
- ☐ Decline to answer      Other, please specify:

In what state or US territory have you lived the longest?

What type of community have you lived in for most of your life?

- ☐ Suburban
- ☐ Rural
- ☐ Urban
- ☐
- ☐ Not defined      Other, please specify:

How would you best describe your dietary preference?

- ☐ Non-vegetarian
- ☐ Vegetarian
- ☐ Vegan
- ☐
- ☐ Not defined      Other, please specify:

Which university do you currently attend?

What is your current year in university?

- ☐ Undergraduate (years 1-5)
- ☐ Masters
- ☐ PhD
- ☐ Post Doc
- ☐ Other, please specify:

What is the general area of your major? Select all apply

- ☐ Animal/Livestock Science
- ☐ Dairy Science
- ☐ Poultry Science
- ☐ Equine Science
- ☐ Other, please specify:

What is your area of specialization?

What are your career plans after graduation?

Which animals do you have experience either raising or working with in the past? Select all that apply.

- Cats or dogs
- Small companion animal (e.g., mouse, hamster, rat)
- Exotic animal (e.g., chinchilla, sugar glider)
- Reptile or amphibian
- Fish
- Livestock (e.g., cows, sheep, pigs, etc.)
- Horses and other equids

- ☐
- ☐ Poultry (e.g., chickens, turkeys, etc.)
- ☐ Laboratory animals in a research setting
- ☐ Wildlife
- ☐  Other, please specify:

Which animals would you like to get experience working with in the future? Select all that apply.

- ☐ Companion animals (e.g. cats and dogs)
- ☐ Livestock (e.g., cows, sheep, pigs, etc.)
- ☐ Horses and other equids
- ☐ Poultry (e.g., chickens, turkeys, etc)
- ☐ Laboratory animals in a research setting
- ☐ Wildlife
- ☐  Other, please specify:
